## Correction: Human and *Drosophila* Cryptochromes Are Light Activated by Flavin Photoreduction in Living Cells

Nathalie Hoang, Erik Schleicher, Sylwia Kacprzak, Jean-Pierre Bouly, Marie Picot, William Wu, Alex Berndt, Eva Wolf, Robert Bittl, Margaret Ahmad

Correction for:

Hoang N, Schleicher E, Kacprzak S, Bouly JP, Picot M, et al. (2008) Human and *Drosophila* cryptochromes are light activated by flavin photoreduction in living cells. PLoS Biol 6(7): e160. doi:10.1371/journal.pbio.0060160

The seventh author's name appears incorrectly. It should be: Alex Berndt.

Citation: Hoang N, Schleicher E, Kacprzak S, Bouly JP, Picot M, et al. (2008) Correction: Human and *Drosophila* Cryptochromes Are Light Activated by Flavin Photoreduction in Living Cells. PLoS Biol 6(8): e200. doi:10.1371/journal.pbio.0060200

Received: July 10, 2008; Accepted: July 10, 2008; Published: August 26, 2008

Copyright: © 2008 Hoang et al. This is an open-access article distributed under the terms of the Creative Commons Attribution License, which permits unrestricted use, distribution, and reproduction in any medium, provided the original author and source are credited.
